# Supplementary material
Source: MDPI journal article supplement (https://www.mdpi.com/2075-163X/11/10/1139)
Supplement: s1 [file s1]

# **Nb-Ta Behavior during Magma-to-Pegmatite Transformation Process: Record from Zircon Megacryst in Pegmatite**

## **Authors**

Sheng He<sup>1,\*</sup>, Ziyang Li<sup>1</sup>, Abdullah Al Jehani<sup>2</sup>, Dongfa Guo<sup>1</sup>, Zaben Harbi<sup>2</sup>, Yuyan Zhang<sup>1</sup>

1. Beijing Research Institute of Uranium Geology, China National Nuclear Corporation, Beijing 100029, China

2. Saudi Geological Survey, Jeddah 21514, Saudi Arabia

Sheng He (First Author, Corresponding Author, \*hesheng201410@163.com)

## **Testing method of major elements composition**

Compositional analyses for whole-rock major elements were conducted at the Analytical Laboratory, Beijing Research Institute of Uranium Geology. Major element compositions were determined using a Philips PW2404 X-ray fluorescence (XRF), with analytical precision better than 1%; FeO was measured using the volumetric method.

## **Nb, Ta content and Nb/Ta ratio of melt**

We can use Nb, Ta content, Nb/Ta ratio of zircon and  $D_{Nb}$ ,  $D_{Ta}$ ,  $D_{Nb}/D_{Ta}$  to calculate Nb, Ta content and Nb/Ta ratio in the melt. The equation is as follows:

$$Nb_{Melt} = \frac{Nb_{Zircon}}{D_{Nb}}$$
$$Ta_{Melt} = \frac{Ta_{Zircon}}{D_{Ta}}$$
$$\frac{Nb_{Melt}}{Ta_{Melt}} = \frac{Nb_{Zircon}}{Ta_{Zircon}} * \frac{D_{Ta}}{D_{Nb}}$$

where  $Nb_{Melt}$ ,  $Ta_{Melt}$ ,  $Nb_{Zircon}$ ,  $Ta_{Zircon}$  are the Nb, Ta content in melt and zircon, respectively.  $D_{Nb}$ ,  $D_{Ta}$  are the partition coefficient for Nb, Ta.

## **Nb, Ta evolution model during fractional crystallization**

We assumed that only rutile and titanite fractional crystallization can intensely increase the Nb/Ta ratio in the melt due to low crystallization amount of mica and amphibole and low  $D_{Nb}$ ,  $D_{Ta}$  of feldspar, quartz and pyroxene. Detailed information can be obtained in article. The equation of Nb, Ta Rayleigh fractionation evolution model is as follows:

$$C^l = C_0 * (1-F)^{D-1}$$
$$D = D_{Nb/Ta} * X$$

where  $C$  are the Nb, Ta content in melt.  $C_0$  are the Nb, Ta concentration in original melt.  $D_{Nb}$ ,  $D_{Ta}$  are the partition coefficient for Nb, Ta.  $D$  are the total partition coefficient for Nb, Ta.  $F$  means the amount of fractional crystallization. And  $X$  means the proportion of rutile or titanite in total crystallization.

## **Supplementary Figures and Tables**

Supplementary Tables S1–S7 are submitted in Excel form, please refer to the electronic form for details.

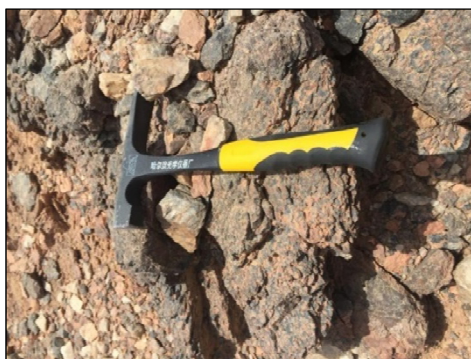

**Supplementary Figure S1** Typical outcrop photo of pegmatite.

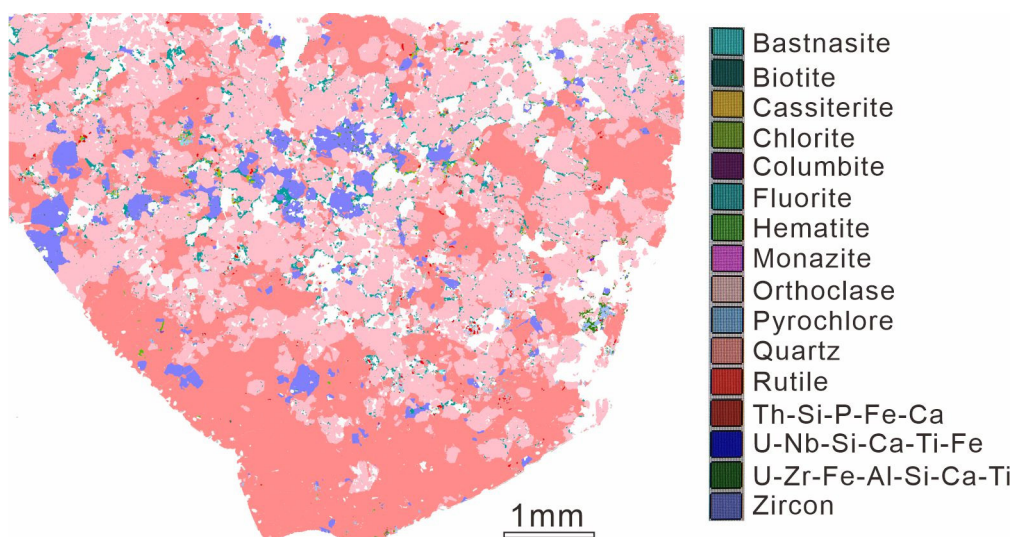

**Supplementary Figure S2.** AMICS-SEM image of marginal zone of pegmatite. AMICS-SEM means the Advanced Mineral Identification and Characterization System (AMICS)-Automated Mineralogy System-Scanning Electron Microscope (SEM)

**Supplementary Table S1** The major elements content of marginal zone of pegmatite (%)

| NO. | Sample   | SiO <sub>2</sub> | Al <sub>2</sub> O <sub>3</sub> | Fe <sub>2</sub> O <sub>3</sub> | MgO   | CaO   | Na <sub>2</sub> O | K <sub>2</sub> O | MnO   | TiO <sub>2</sub> | P <sub>2</sub> O <sub>5</sub> | LOI* | FeO  |
|-----|----------|------------------|--------------------------------|--------------------------------|-------|-------|-------------------|------------------|-------|------------------|-------------------------------|------|------|
| 1   | HS-3-1-1 | 68.54            | 10.74                          | 4.87                           | 0.335 | 0.773 | 0.671             | 7.01             | 0.074 | 0.588            | 0.052                         | 2.32 | 0.42 |
| 2   | HS-3-1-2 | 68.56            | 10.67                          | 4.94                           | 0.331 | 0.781 | 0.683             | 7.02             | 0.075 | 0.587            | 0.052                         | 2.31 | 0.4  |
| 3   | HS-3-2-1 | 68.74            | 10.61                          | 4.86                           | 0.344 | 0.768 | 0.677             | 6.95             | 0.072 | 0.587            | 0.056                         | 2.32 | 0.39 |
| 4   | HS-3-2-2 | 68.75            | 10.7                           | 4.78                           | 0.334 | 0.771 | 0.665             | 6.97             | 0.071 | 0.584            | 0.058                         | 2.31 | 0.34 |

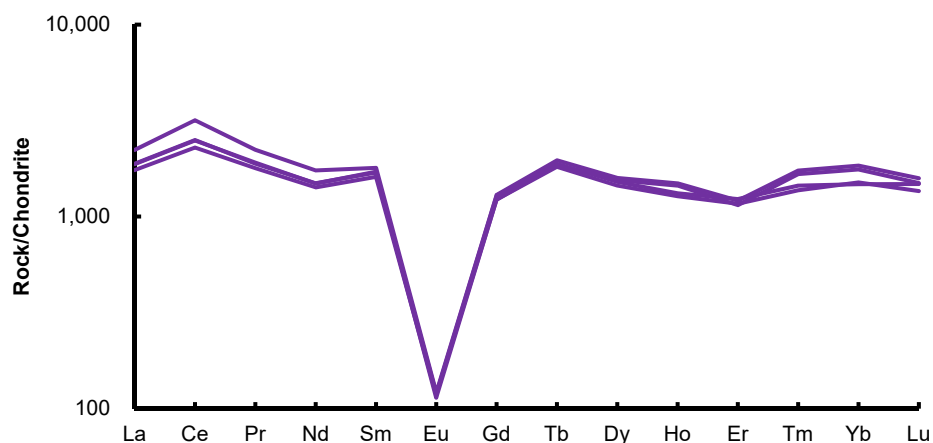

**Supplementary Figure S3.** Chondrite-normalized REE patterns of marginal zone of pegmatite. The chondrite and primitive mantle values are from McDonough and Sun [1].

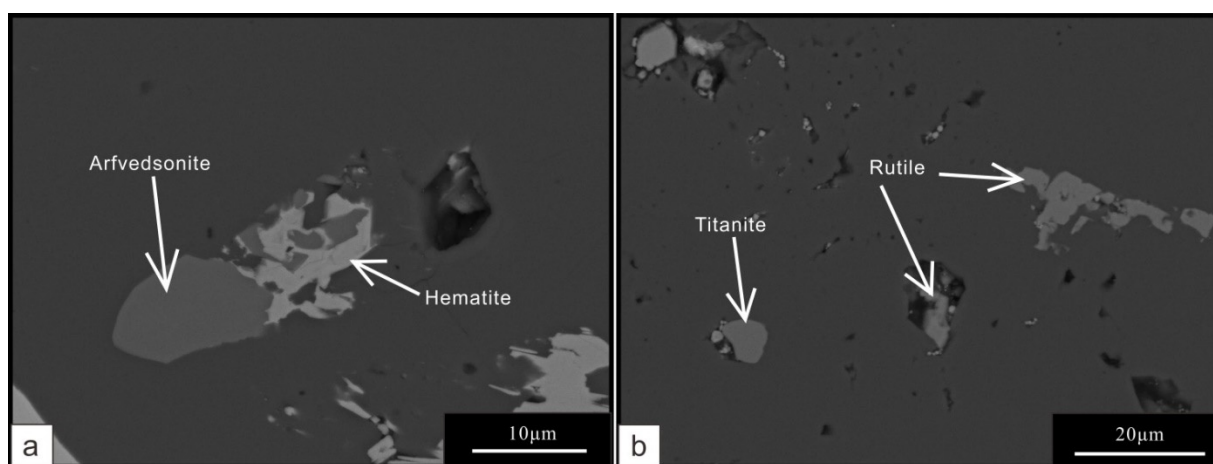

**Supplementary Figure S4.** Arfvedsonite, hematite, titanite and rutile occur in marginal zone of pegmatite, hematite replaces arfvedsonite, which indicates higher oxygen fugacity in late magma. (a) Arfvedsonite and hematite occur in marginal zone; (b) Titanite and rutile occur in marginal zone.

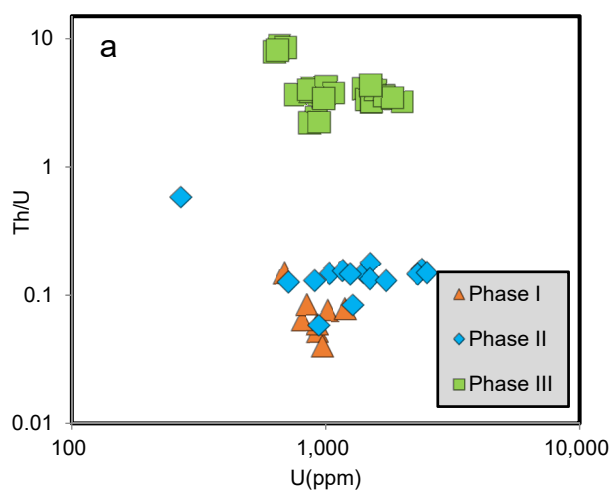

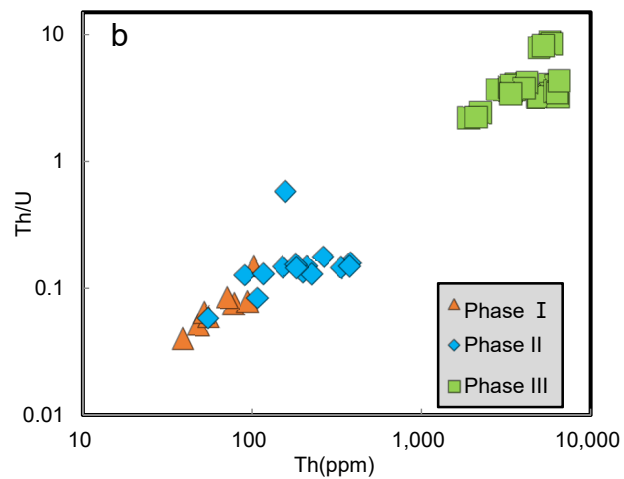

**Supplementary Figure S5.** Th/U ratios vs U, Th content of Phase I, II, III zircon, Th content and Th/U ratio of Phase III zircon is much higher than those of Phase I, II (**a and b**)

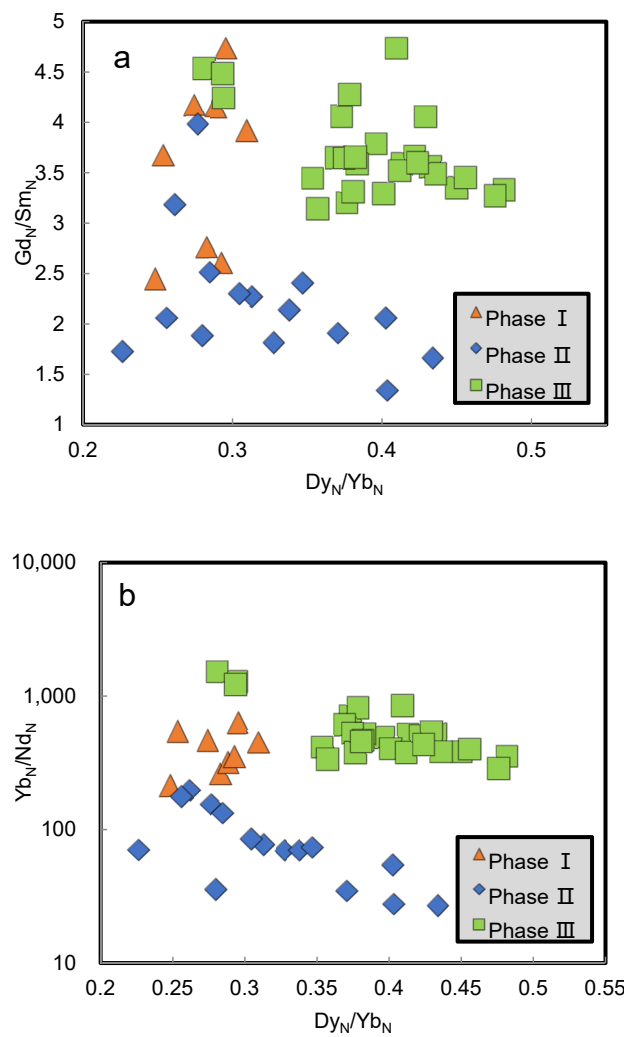

**Supplementary Figure S6** REE evolution characteristics of Phase I, II, III in zircon megacryst (**a and b**)

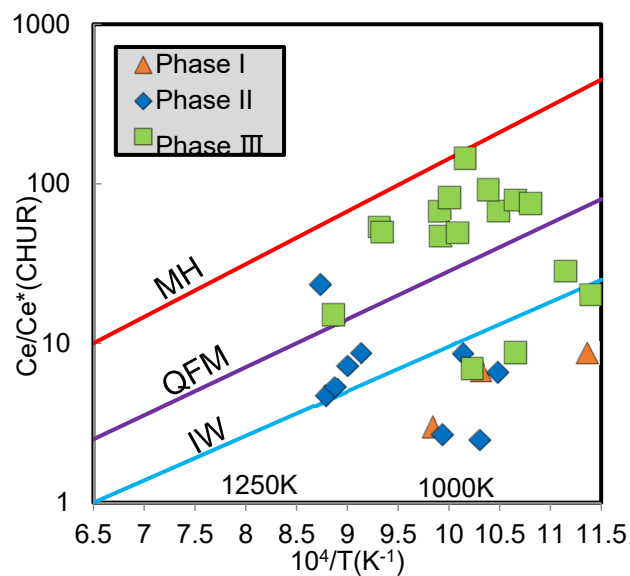

**Supplementary Figure S7.** Magnitude of Ce anomaly versus  $10^4/T$  ( $K^{-1}$ ) for Phase I, II and III. The Ce anomaly is calculated as  $(Ce/Ce^*)_{CHUR} = (Ce_N) / [(La_N \times Pr_N)^{0.5}]$  where  $La_N$ ,  $Ce_N$ ,  $Pr_N$  are the La, Ce, Pr contents normalized to chondrite [1]. The plot also shows the magnitudes of Ce anomalies in zircon corresponding to several common oxygen fugacity buffers (MH = magnetite-hematite; QFM = quartz-fayalite-magnetite; IW = iron-wüstite). Temperatures of zircon megacryst were calculated by Ti-in-zircon thermometry [2], assuming  $\alpha_{SiO_2} = 1$ ,  $\alpha_{TiO_2} = 1$

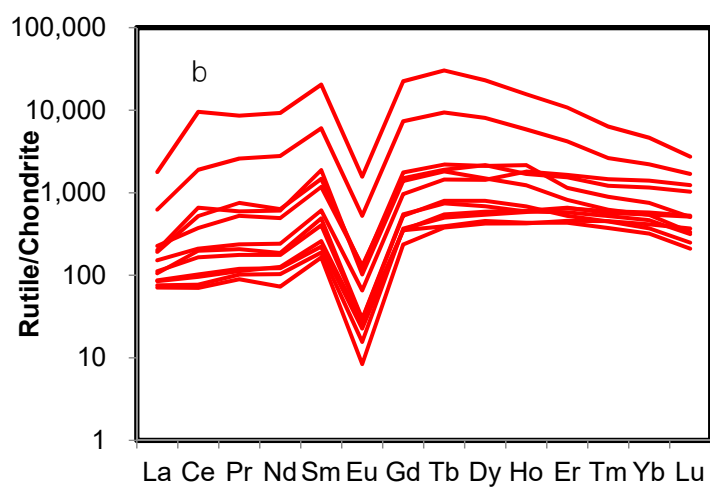

**Supplementary Figure S8.** REE evolution characteristics of rutile

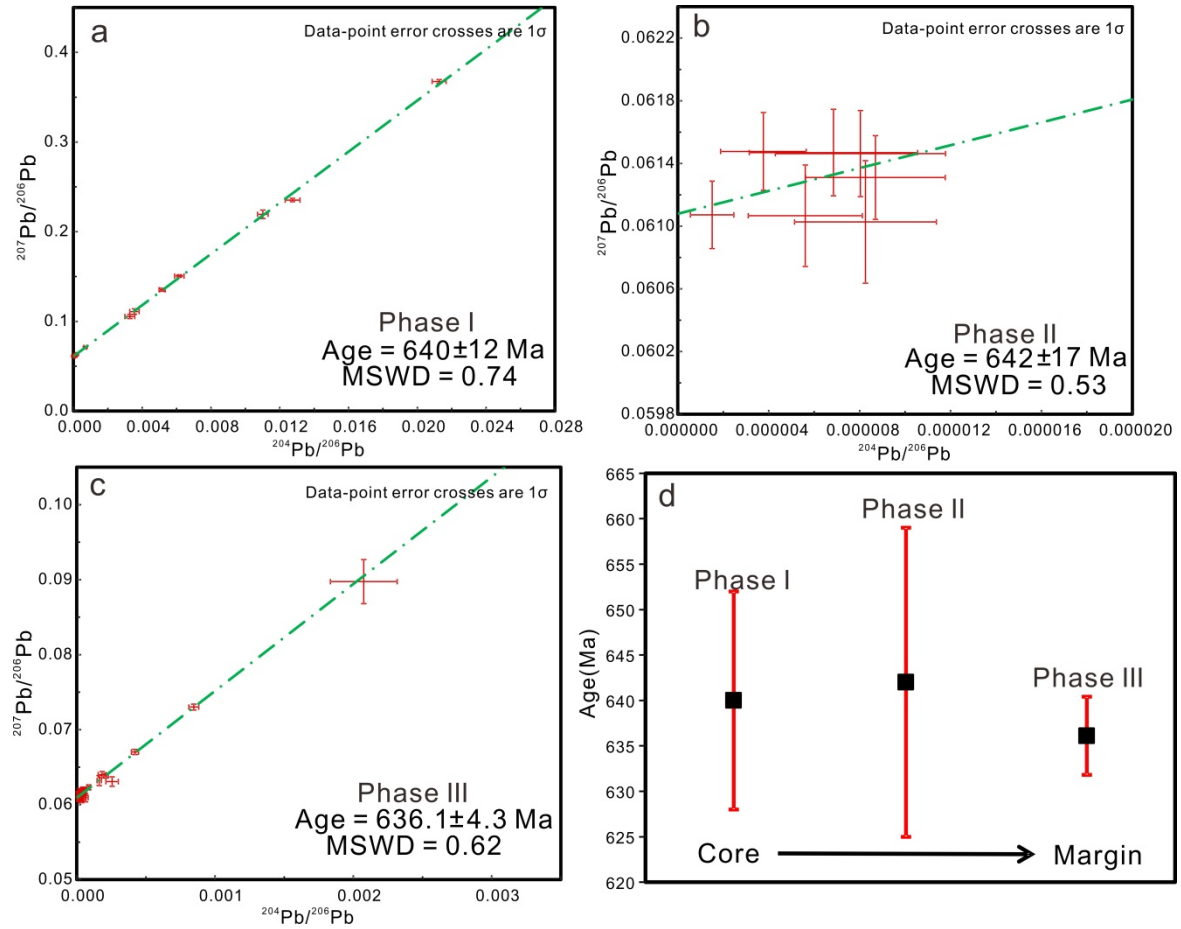

**Supplementary Figure S9.**  $^{207}\text{Pb}/^{206}\text{Pb}$ - $^{204}\text{Pb}/^{206}\text{Pb}$  isochron for zircon megacryst (phase I to Phase III zircon) (a-d)

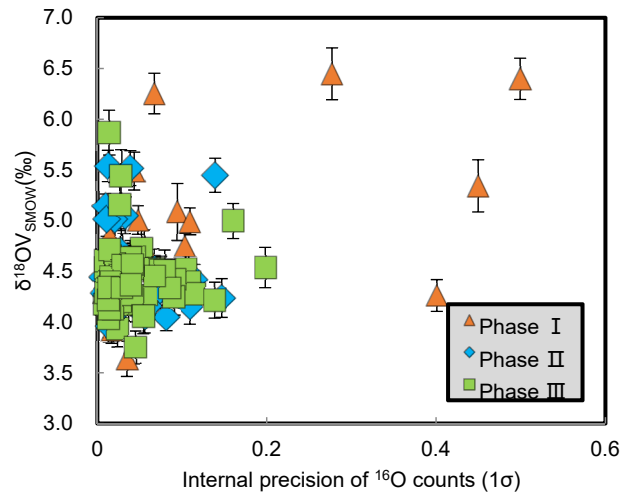

**Supplementary Figure S10.** The  $\delta^{18}\text{O}$  value vs internal precision of  $^{16}\text{O}$  counts, indicating that  $>6.0\text{‰}$  of phase I may result from contamination of mineral inclusions

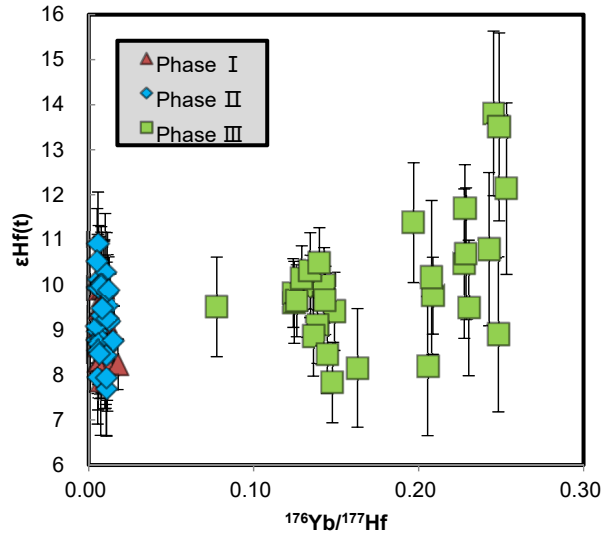

**Supplementary Figure S11.** The  $^{176}\text{Yb}/^{177}\text{Hf}$  value vs  $\varepsilon\text{Hf}(t)$ , indicating that higher  $\varepsilon\text{Hf}(t)$  of  $>12.0$  in phase III may result from high Yb content and inaccurate correction of  $^{176}\text{Yb}$ . Error bars are  $1\sigma$

**Supplementary Table S13.** Nb, Ta partition coefficient compiled from previous studies

| No. | Rock/melt type                                   | $D_{\text{Nb}}$ | $D_{\text{Ta}}$ | $D_{\text{Nb/Ta}}$ | References |
|-----|--------------------------------------------------|-----------------|-----------------|--------------------|------------|
| 1   | Synthetic andesitic melt                         | 0.089           | 0.078           | 1.14               | [3]        |
| 2   | Coarse-grained hornblende biotite quartz diorite | 236             |                 |                    | [4]        |
| 3   | A-type granitoids                                | 21              | 6.3             | 3.33               | [5]        |
| 4   |                                                  | 2.2             | 2.4             | 0.92               |            |
| 5   |                                                  | 26.5            | 14.5            | 1.83               |            |
| 6   |                                                  | 2.62            |                 |                    |            |
| 7   | I-type-magmatic-arc related granitoids           | 0.3             | 0.8             | 0.38               |            |
| 8   |                                                  | 1.9             | 2.6             | 0.73               |            |
| 9   |                                                  | 0.3             | 15.1            | 0.02               |            |
| 10  | Shoshonitic granodiorites                        | 3.5             | 3.3             | 1.06               |            |
| 11  | Quartz monzonites                                | 0.5             | 1.9             | 0.26               |            |
| 12  |                                                  | 0.3             | 1.2             | 0.25               |            |
| 13  | Ultrapotassic syenogranite                       | 0.6             | 0.8             | 0.75               | [6]        |
| 14  |                                                  | 1.6             | 2.9             | 0.55               |            |
| 15  | Silicic magma                                    | 2.09            | 1.29            | 1.62               | [6]        |

**Supplementary Table S14.** Nb/Ta ratio of melt calculated by zircon Nb/Ta ratio, assuming  $D_{\text{Nb}}/D_{\text{Ta}}=3$  and  $D_{\text{Nb}}/D_{\text{Ta}}=0.3$

| Samples  | Zircon phases | Assuming $D_{\text{Nb}}/D_{\text{Ta}}=3$ | Assuming $D_{\text{Nb}}/D_{\text{Ta}}=0.3$ |
|----------|---------------|------------------------------------------|--------------------------------------------|
| z2526-33 | Phase I       | 0.088                                    | 0.876                                      |
| z2526-34 | Phase I       | 0.078                                    | 0.775                                      |
| z2526-35 | Phase I       | 0.045                                    | 0.451                                      |
| z2526-36 | Phase I       | 0.061                                    | 0.615                                      |

|          |           |       |        |
|----------|-----------|-------|--------|
| z2526-37 | Phase I   | 0.127 | 1.274  |
| z2526-38 | Phase I   | 0.111 | 1.111  |
| z2526-39 | Phase I   | 0.189 | 1.893  |
| G496-27  | Phase I   | 0.104 | 1.041  |
| z2526-1  | Phase II  | 0.731 | 7.311  |
| z2526-2  | Phase II  | 0.671 | 6.710  |
| z2526-3  | Phase II  | 0.622 | 6.217  |
| z2526-4  | Phase II  | 0.534 | 5.337  |
| z2526-5  | Phase II  | 0.472 | 4.723  |
| z2526-6  | Phase II  | 0.565 | 5.648  |
| z2526-9  | Phase II  | 0.224 | 2.237  |
| z2526-29 | Phase II  | 0.167 | 1.672  |
| z2526-30 | Phase II  | 0.188 | 1.875  |
| z2526-31 | Phase II  | 0.168 | 1.681  |
| z2526-32 | Phase II  | 0.436 | 4.360  |
| z2526-41 | Phase II  | 0.884 | 8.841  |
| z2526-42 | Phase II  | 0.575 | 5.747  |
| z2526-44 | Phase II  | 0.363 | 3.626  |
| G495-13  | Phase II  | 0.481 | 4.810  |
| z2526-15 | Phase III | 2.487 | 24.867 |
| z2526-16 | Phase III | 2.957 | 29.571 |
| z2526-19 | Phase III | 3.292 | 32.925 |
| z2526-20 | Phase III | 3.250 | 32.497 |
| z2526-21 | Phase III | 3.230 | 32.302 |
| z2526-22 | Phase III | 4.516 | 45.162 |
| z2526-24 | Phase III | 4.476 | 44.763 |
| z2526-25 | Phase III | 2.011 | 20.112 |
| z2526-26 | Phase III | 1.888 | 18.884 |
| z2526-27 | Phase III | 2.335 | 23.355 |
| z2526-28 | Phase III | 2.040 | 20.397 |
| z2526-50 | Phase III | 1.972 | 19.722 |
| z2526-51 | Phase III | 4.036 | 40.357 |
| z2526-52 | Phase III | 4.810 | 48.099 |
| z2526-53 | Phase III | 4.431 | 44.308 |
| z2526-54 | Phase III | 4.060 | 40.605 |
| G495-11  | Phase III | 3.473 | 34.733 |
| G495-19  | Phase III | 3.260 | 32.596 |
| G495-28  | Phase III | 2.656 | 26.560 |
| G495-29  | Phase III | 2.376 | 23.764 |
| G495-30  | Phase III | 2.954 | 29.537 |
| G495-32  | Phase III | 4.259 | 42.591 |
| G495-33  | Phase III | 2.396 | 23.962 |
| G496-19  | Phase III | 1.860 | 18.602 |
| G496-20  | Phase III | 1.871 | 18.708 |



|         |           |       |        |
|---------|-----------|-------|--------|
| G496-21 | Phase III | 2.190 | 21.904 |
| G496-22 | Phase III | 1.792 | 17.921 |

**Supplementary Table S15.** Nb, Ta content and Nb/Ta ratio of melt calculated by  $D_{Nb}=0.08$ ,  $D_{Ta}=0.13$

| Samples  | Zircon phases | Nb (ppm) | Ta (ppm) | Nb/Ta |
|----------|---------------|----------|----------|-------|
| z2526-33 | Phase I       | 20       | 47       | 0.4   |
| z2526-34 | Phase I       | 24       | 64       | 0.4   |
| z2526-35 | Phase I       | 15       | 68       | 0.2   |
| z2526-36 | Phase I       | 22       | 74       | 0.3   |
| z2526-37 | Phase I       | 31       | 51       | 0.6   |
| z2526-38 | Phase I       | 23       | 42       | 0.5   |
| z2526-39 | Phase I       | 34       | 37       | 0.9   |
| G496-27  | Phase I       | 68       | 133      | 0.5   |
| z2526-1  | Phase II      | 906      | 254      | 3.6   |
| z2526-2  | Phase II      | 856      | 262      | 3.3   |
| z2526-3  | Phase II      | 792      | 261      | 3.0   |
| z2526-4  | Phase II      | 2211     | 850      | 2.6   |
| z2526-5  | Phase II      | 1689     | 733      | 2.3   |
| z2526-6  | Phase II      | 2435     | 884      | 2.8   |
| z2526-9  | Phase II      | 1850     | 789      | 2.3   |
| z2526-29 | Phase II      | 649      | 595      | 1.1   |
| z2526-30 | Phase II      | 965      | 1184     | 0.8   |
| z2526-31 | Phase II      | 789      | 863      | 0.9   |
| z2526-32 | Phase II      | 825      | 1007     | 0.8   |
| z2526-41 | Phase II      | 606      | 285      | 2.1   |
| z2526-42 | Phase II      | 452      | 105      | 4.3   |
| z2526-44 | Phase II      | 298      | 106      | 2.8   |
| G495-13  | Phase II      | 888      | 502      | 1.8   |
| z2526-15 | Phase III     | 2656     | 157      | 16.9  |
| z2526-16 | Phase III     | 2477     | 156      | 15.9  |
| z2526-19 | Phase III     | 623      | 48       | 12.9  |
| z2526-20 | Phase III     | 579      | 50       | 11.6  |
| z2526-21 | Phase III     | 638      | 44       | 14.4  |
| z2526-22 | Phase III     | 1858     | 89       | 20.8  |
| z2526-24 | Phase III     | 1656     | 137      | 12.1  |
| z2526-25 | Phase III     | 1954     | 136      | 14.4  |
| z2526-26 | Phase III     | 1743     | 109      | 16.1  |
| z2526-27 | Phase III     | 2162     | 136      | 15.8  |
| z2526-28 | Phase III     | 2419     | 154      | 15.7  |
| z2526-50 | Phase III     | 1615     | 138      | 11.7  |
| z2526-51 | Phase III     | 1776     | 196      | 9.1   |
| z2526-52 | Phase III     | 1580     | 173      | 9.1   |
| z2526-53 | Phase III     | 1674     | 157      | 10.7  |
| z2526-54 | Phase III     | 1566     | 179      | 8.7   |

|         |           |      |     |      |
|---------|-----------|------|-----|------|
| G495-11 | Phase III | 1921 | 87  | 22.0 |
| G495-19 | Phase III | 1702 | 78  | 21.8 |
| G495-28 | Phase III | 1656 | 169 | 9.8  |
| G495-29 | Phase III | 671  | 73  | 9.2  |
| G495-30 | Phase III | 674  | 59  | 11.4 |
| G495-32 | Phase III | 1463 | 147 | 9.9  |
| G495-33 | Phase III | 903  | 94  | 9.6  |
| G496-19 | Phase III | 2063 | 105 | 19.7 |
| G496-20 | Phase III | 2141 | 91  | 23.4 |
| G496-21 | Phase III | 2290 | 106 | 21.6 |
| G496-22 | Phase III | 1905 | 96  | 19.8 |

### **Supplementary References**

1. McDonough, W. and S.s. Sun, The composition of the Earth. *Chem. Geol.* **1995**, 120, 3-4, 223-253.
2. Ferry, J.M. and E.B. Watson, New thermodynamic models and revised calibrations for the Ti-in-zircon and Zr-in-rutile thermometers. *Contrib. Mineral. Petr.* **2007**, 154, 4, 429-437.
3. Burnham, A.D. and A.J. Berry, An experimental study of trace element partitioning between zircon and melt as a function of oxygen fugacity. *Geochim. Cosmochim. Acta* **2012**, 95, 196-212.
4. Thomas, J.B., et al., Determination of zircon/melt trace element partition coefficients from SIMS analysis of melt inclusions in zircon. *Geochim. Cosmochim. Acta* **2002**, 66, 16, 2887-2901.
5. Nardi, L.V.S., et al., Zircon/rock partition coefficients of REEs, Y, Th, U, Nb, and Ta in granitic rocks: Uses for provenance and mineral exploration purposes. *Chem. Geol.* **2013**, 335, 1-7.
6. Bachmann, O., M.A. Dungan, and F. Bussy, Insights into shallow magmatic processes in large silicic magma bodies: the trace element record in the Fish Canyon magma body, Colorado. *Contrib. Mineral. Petr.* **2005**, 149, 3, 338-349.
